# Supplementary material for: Spatiotemporal trends in tuberculosis incidence in Thailand, 2012–2023: a nationwide, province-level analysis
Source: Research Square preprint supplement (doi:10.21203/rs.3.rs-8460167/v1), 2026-01-06
Supplement: Supplementary file 1 [file 0370c0adb46951f039466ddc.xlsx]

## Sheet: Sheet1
Health Region	Year	ASR_100k	SE	GAM_Fit	Deriv	APC_GAM	Fit_se	Fit_low	Fit_high
Health Region 1	2012	29.35	0.73	28.0739	-6.37775	-22.7177	2.37758	23.4138	32.734
Health Region 1	2013	20.3	0.61	21.6961	-5.7077	-26.3074	1.50664	18.7431	24.6492
Health Region 1	2014	16.64	0.55	16.6585	-3.77655	-22.6704	1.59415	13.534	19.783
Health Region 1	2015	15.07	0.52	14.1431	-1.05473	-7.45758	1.5787	11.0488	17.2373
Health Region 1	2016	11.61	0.46	14.549	1.53343	10.5397	1.44334	11.7201	17.378
Health Region 1	2017	18.47	0.58	17.2099	3.04226	17.6773	1.54293	14.1858	20.2341
Health Region 1	2018	22.75	0.64	20.6335	2.93698	14.234	1.54293	17.6094	23.6577
Health Region 1	2019	21.05	0.62	23.0839	1.30129	5.63723	1.44334	20.2549	25.9128
Health Region 1	2020	24	0.66	23.2361	-1.22277	-5.26236	1.5787	20.1419	26.3304
Health Region 1	2021	18.85	0.58	20.6383	-3.72117	-18.0304	1.59415	17.5138	23.7629
Health Region 1	2022	20.32	0.59	15.7938	-5.41727	-34.3	1.50664	12.8408	18.7468
Health Region 1	2023	7.11	0.34	9.8038	-5.98998	-61.0986	2.37758	5.14374	14.4639
Health Region 2	2012	28.97	0.93	22.9602	-7.17025	-31.2291	4.78276	13.586	32.3344
Health Region 2	2013	12.6	0.61	15.7899	-6.64394	-42.0771	3.20428	9.50953	22.0703
Health Region 2	2014	5.42	0.4	9.6723	-5.08573	-52.5804	3.02306	3.7471	15.5975
Health Region 2	2015	4.72	0.37	5.61846	-2.75159	-48.9741	3.04578	-0.351261	11.5882
Health Region 2	2016	3.75	0.33	4.16911	-0.223851	-5.36928	2.92336	-1.56068	9.8989
Health Region 2	2017	7.86	0.48	5.17076	1.85828	35.9383	2.97009	-0.650621	10.9921
Health Region 2	2018	8.83	0.51	7.88568	3.0727	38.9655	2.97009	2.0643	13.7071
Health Region 2	2019	8.66	0.5	11.3162	3.34768	29.5832	2.92336	5.58637	17.0459
Health Region 2	2020	9.15	0.52	14.581	2.93744	20.1456	3.04578	8.61132	20.5508
Health Region 2	2021	22.61	0.82	17.191	2.27151	13.2134	3.02306	11.2658	23.1162
Health Region 2	2022	28.53	0.9	19.1241	1.74514	9.12537	3.20428	12.8437	25.4045
Health Region 2	2023	13.06	0.6	20.6813	1.55724	7.5297	4.78276	11.3071	30.0555
Health Region 3	2012	41.87	1.19	42.8804	-16.9363	-39.4965	3.86726	35.3006	50.4602
Health Region 3	2013	30.79	1.02	25.9441	-14.7738	-56.9445	2.44363	21.1546	30.7336
Health Region 3	2014	10.51	0.6	13.3329	-9.1839	-68.8815	2.60374	8.22957	18.4362
Health Region 3	2015	5.33	0.42	7.57634	-2.79895	-36.9433	2.57287	2.53352	12.6192
Health Region 3	2016	2.91	0.31	7.735	1.31334	16.9792	2.3449	3.13899	12.331
Health Region 3	2017	17.14	0.76	10.203	1.75484	17.1992	2.51818	5.26741	15.1387
Health Region 3	2018	14.34	0.7	11.2447	-0.453054	-4.02905	2.51818	6.30906	16.1803
Health Region 3	2019	5.56	0.44	9.29693	-2.84266	-30.5763	2.3449	4.70092	13.8929
Health Region 3	2020	3.84	0.36	5.55937	-3.33305	-59.9536	2.57287	0.516553	10.6022
Health Region 3	2021	2.81	0.31	2.63083	-1.64802	-62.6427	2.60374	-2.47249	7.73415
Health Region 3	2022	4.72	0.4	2.26333	0.676109	29.8724	2.44363	-2.52618	7.05284
Health Region 3	2023	2.83	0.31	3.98305	1.71972	43.1761	3.86726	-3.59678	11.5629
Health Region 4	2012	21.37	0.65	22.0964	-5.79307	-26.2172	1.17805	19.7874	24.4054
Health Region 4	2013	17.42	0.59	16.3034	-5.53945	-33.9774	0.748588	14.8361	17.7706
Health Region 4	2014	11.8	0.48	11.0175	-4.74711	-43.0869	0.786792	9.47541	12.5596
Health Region 4	2015	7.07	0.37	6.80913	-3.46113	-50.8306	0.780721	5.27892	8.33935
Health Region 4	2016	1.44	0.17	4.09527	-1.93549	-47.2615	0.715904	2.6921	5.49845
Health Region 4	2017	2.59	0.22	2.93816	-0.552779	-18.8138	0.762074	1.44449	4.43182
Health Region 4	2018	4.02	0.28	2.98972	0.33309	11.1412	0.762074	1.49605	4.48338
Health Region 4	2019	5.01	0.31	3.60434	0.546396	15.1594	0.715904	2.20116	5.00751
Health Region 4	2020	3.91	0.27	4.08251	0.170869	4.18539	0.780721	2.5523	5.61272
Health Region 4	2021	3	0.24	3.94607	-0.484478	-12.2775	0.786792	2.40396	5.48819
Health Region 4	2022	3.12	0.24	3.11355	-1.04107	-33.4366	0.748588	1.64632	4.58079
Health Region 4	2023	2.11	0.19	1.86394	-1.24961	-67.0411	1.17805	-0.445037	4.17293
Health Region 5	2012	25.19	0.71	17.9206	-0.943026	-5.26226	2.6655	12.6962	23.1449
Health Region 5	2013	13.5	0.52	16.9775	-0.943018	-5.55451	2.32801	12.4146	21.5404
Health Region 5	2014	13.42	0.52	16.0345	-0.942994	-5.88102	2.01783	12.0796	19.9895
Health Region 5	2015	10.42	0.45	15.0915	-0.942962	-6.24829	1.74952	11.6625	18.5206
Health Region 5	2016	8.67	0.41	14.1486	-0.942937	-6.66453	1.54501	11.1204	17.1768
Health Region 5	2017	12.66	0.5	13.2057	-0.942927	-7.14032	1.43184	10.3992	16.0121
Health Region 5	2018	20.06	0.63	12.2627	-0.942938	-7.68946	1.43184	9.45632	15.0692
Health Region 5	2019	13.54	0.51	11.3198	-0.942964	-8.33022	1.54501	8.29158	14.348
Health Region 5	2020	12.57	0.49	10.3768	-0.942995	-9.08753	1.74952	6.94774	13.8059
Health Region 5	2021	9.15	0.42	9.4338	-0.943023	-9.99622	2.01783	5.47885	13.3887
Health Region 5	2022	11.95	0.47	8.49076	-0.94304	-11.1067	2.32801	3.92787	13.0537
Health Region 5	2023	1.68	0.17	7.54772	-0.943045	-12.4944	2.6655	2.32333	12.7721
Health Region 6	2012	53.86	0.98	50.6776	-22.4527	-44.305	4.0943	42.6528	58.7025
Health Region 6	2013	23.71	0.65	28.2249	-19.3257	-68.4705	2.56723	23.1931	33.2567
Health Region 6	2014	11.56	0.45	12.0262	-11.0341	-91.7503	2.78888	6.55997	17.4924
Health Region 6	2015	10.3	0.42	6.15678	-1.03315	-16.7807	2.73796	0.790387	11.5232
Health Region 6	2016	4.75	0.28	9.95988	6.23273	62.5783	2.4735	5.11181	14.8079
Health Region 6	2017	20.61	0.59	18.6222	8.15059	43.7681	2.692	13.3459	23.8985
Health Region 6	2018	27.06	0.67	26.2611	5.2603	20.0308	2.692	20.9848	31.5374
Health Region 6	2019	31.28	0.72	29.1428	0.415648	1.42624	2.4735	24.2948	33.9909
Health Region 6	2020	25.43	0.65	27.0924	-3.3127	-12.2274	2.73796	21.726	32.4588
Health Region 6	2021	18.37	0.55	22.5174	-4.53828	-20.1545	2.78888	17.0512	27.9837
Health Region 6	2022	24.49	0.63	18.0158	-4.04729	-22.4652	2.56723	12.984	23.0476
Health Region 6	2023	11.7	0.42	14.4229	-3.59293	-24.9113	4.0943	6.39805	22.4477
Health Region 7	2012	36.46	0.86	29.2102	-17.5097	-59.9437	5.36049	18.7037	39.7168
Health Region 7	2013	1.34	0.16	11.7005	-14.6406	-125.128	3.38536	5.06524	18.3358
Health Region 7	2014	0.29	0.08	-0.0710005	-7.06821	9955.16	3.61192	-7.15037	7.00837
Health Region 7	2015	0.28	0.07	-2.43589	1.96357	-80.6101	3.5676	-9.42839	4.5566
Health Region 7	2016	0.33	0.08	3.85615	8.33198	216.07	3.24957	-2.513	10.2253
Health Region 7	2017	17.96	0.6	14.2281	9.66914	67.9582	3.49275	7.38227	21.0739
Health Region 7	2018	26.81	0.73	23.1944	6.57041	28.3275	3.49275	16.3486	30.0402
Health Region 7	2019	20.92	0.65	27.3689	1.77394	6.48161	3.24957	20.9997	33.738
Health Region 7	2020	28.91	0.76	26.7423	-1.82943	-6.84097	3.5676	19.7498	33.7348
Health Region 7	2021	23.06	0.68	23.71	-2.9801	-12.5689	3.61192	16.6306	30.7894
Health Region 7	2022	24.47	0.7	20.7821	-2.48293	-11.9474	3.38536	14.1468	27.4174
Health Region 7	2023	16.2	0.56	18.7442	-2.03795	-10.8724	5.36049	8.23761	29.2507
Health Region 8	2012	36.16	0.82	31.241	-17.5306	-56.1143	3.46395	24.4516	38.0303
Health Region 8	2013	6.21	0.34	13.7103	-14.84	-108.24	2.17252	9.45219	17.9685
Health Region 8	2014	1.57	0.17	1.56094	-7.78943	-499.022	2.35861	-3.06195	6.18382
Health Region 8	2015	1.19	0.15	-1.86853	0.495852	-26.537	2.31606	-6.408	2.67094
Health Region 8	2016	0.75	0.12	2.55264	6.15913	241.284	2.09295	-1.54955	6.65483
Health Region 8	2017	12.65	0.48	10.4497	7.13527	68.2819	2.27681	5.98716	14.9123
Health Region 8	2018	16.98	0.56	16.8232	4.22032	25.0864	2.27681	12.3606	21.2857
Health Region 8	2019	16.4	0.55	18.8904	0.156259	0.827189	2.09295	14.7882	22.9926
Health Region 8	2020	18.62	0.58	17.1357	-2.37462	-13.8578	2.31606	12.5962	21.6752
Health Region 8	2021	13.62	0.5	14.1411	-2.45661	-17.3721	2.35861	9.51823	18.764
Health Region 8	2022	13.75	0.5	12.2225	-1.22	-9.9816	2.17252	7.96433	16.4806
Health Region 8	2023	10.66	0.43	11.7011	-0.521345	-4.45551	3.46395	4.91178	18.4905
Health Region 9	2012	34.85	0.73	30.1187	-14.2829	-47.4219	2.99911	24.2404	35.9969
Health Region 9	2013	10.3	0.39	15.8358	-12.5629	-79.3321	1.893	12.1255	19.5461
Health Region 9	2014	2.31	0.19	4.99292	-8.02064	-160.64	2.02248	1.02886	8.95698
Health Region 9	2015	1.75	0.16	-0.205468	-2.56957	1250.59	1.99677	-4.11914	3.7082
Health Region 9	2016	1.76	0.16	-0.146216	1.40708	-962.328	1.81764	-3.70878	3.41635
Health Region 9	2017	3.39	0.23	2.60868	2.61645	100.298	1.95547	-1.22403	6.4414
Health Region 9	2018	4.49	0.26	5.08668	1.51509	29.7855	1.95547	1.25396	8.91939
Health Region 9	2019	4.57	0.26	5.63887	-0.262164	-4.64924	1.81764	2.0763	9.20143
Health Region 9	2020	3.56	0.23	4.56235	-1.14105	-25.0101	1.99677	0.648677	8.47602
Health Region 9	2021	3.8	0.24	3.35677	-0.648094	-19.3071	2.02248	-0.607294	7.32083
Health Region 9	2022	6.43	0.31	3.26616	0.449017	13.7475	1.893	-0.444115	6.97643
Health Region 9	2023	2.16	0.18	4.2548	0.988641	23.2359	2.99911	-1.62346	10.1331
Health Region 10	2012	29.7	0.81	24.5457	-14.0992	-57.4404	5.23638	14.2824	34.809
Health Region 10	2013	3.5	0.28	10.4466	-11.0154	-105.445	3.29391	3.99051	16.9026
Health Region 10	2014	2.77	0.25	2.515	-2.93125	-116.551	3.54925	-4.44153	9.47153
Health Region 10	2015	4.55	0.32	4.58407	6.51827	142.194	3.49428	-2.26471	11.4329
Health Region 10	2016	13.87	0.55	15.5515	12.7201	81.7935	3.16857	9.34115	21.7619
Health Region 10	2017	35.39	0.88	30.0244	13.0058	43.3175	3.42868	23.3042	36.7446
Health Region 10	2018	40.61	0.94	41.5632	8.02986	19.3196	3.42868	34.843	48.2834
Health Region 10	2019	43.61	0.98	46.0841	0.918451	1.99299	3.16857	39.8737	52.2945
Health Region 10	2020	45.65	1	43.4001	-4.90552	-11.303	3.49428	36.5513	50.2489
Health Region 10	2021	30.78	0.82	36.273	-7.73592	-21.3269	3.54925	29.3165	43.2296
Health Region 10	2022	37.15	0.9	27.9282	-8.18445	-29.3053	3.29391	21.4722	34.3843
Health Region 10	2023	15.24	0.57	19.9041	-8.0241	-40.3137	5.23638	9.64083	30.1674
Health Region 11	2012	38.79	0.96	28.7097	-11.3861	-39.6594	5.46398	18.0003	39.4191
Health Region 11	2013	7.83	0.43	17.3236	-10.2217	-59.0046	3.58232	10.3023	24.345
Health Region 11	2014	2.97	0.26	8.26627	-7.03013	-85.046	3.51644	1.37405	15.1585
Health Region 11	2015	3.17	0.27	3.26336	-2.89179	-88.6139	3.53876	-3.6726	10.1993
Health Region 11	2016	3.92	0.3	2.48268	0.63694	25.6554	3.34148	-4.06662	9.03198
Health Region 11	2017	11.57	0.51	4.53724	2.44398	53.8648	3.43594	-2.1972	11.2717
Health Region 11	2018	4.37	0.32	7.37063	2.39238	32.4583	3.43594	0.636184	14.1051
Health Region 11	2019	4.39	0.32	9.32201	1.19118	12.7782	3.34148	2.77271	15.8713
Health Region 11	2020	11.25	0.5	9.75299	-0.17075	-1.75075	3.53876	2.81703	16.689
Health Region 11	2021	13.23	0.55	8.98051	-1.02641	-11.4293	3.51644	2.08829	15.8727
Health Region 11	2022	9.65	0.46	7.70018	-1.30487	-16.9459	3.58232	0.678829	14.7215
Health Region 11	2023	2.94	0.25	6.37078	-1.3294	-20.8671	5.46398	-4.33862	17.0802
Health Region 12	2012	20.34	0.66	19.7001	-13.1319	-66.659	5.27791	9.35536	30.0448
Health Region 12	2013	4.47	0.31	6.5682	-10.402	-158.369	3.32635	0.0485578	13.0878
Health Region 12	2014	2.86	0.24	-1.10389	-3.22282	291.95	3.56718	-8.09556	5.88777
Health Region 12	2015	1.86	0.2	0.12257	5.21776	4256.97	3.51753	-6.77178	7.01692
Health Region 12	2016	0.86	0.13	9.33162	10.8074	115.815	3.19656	3.06636	15.5969
Health Region 12	2017	18.31	0.61	21.7374	11.0771	50.9587	3.44765	14.98	28.4948
Health Region 12	2018	39.42	0.9	31.4858	6.46882	20.5452	3.44765	24.7284	38.2432
Health Region 12	2019	40.34	0.9	34.675	-0.328761	-0.948121	3.19656	28.4098	40.9403
Health Region 12	2020	25.53	0.72	30.8283	-6.22876	-20.2047	3.51753	23.9339	37.7226
Health Region 12	2021	23.49	0.69	22.2175	-9.52057	-42.8516	3.56718	15.2259	29.2092
Health Region 12	2022	7.04	0.37	11.7871	-10.4936	-89.0259	3.32635	5.26748	18.3068
Health Region 12	2023	4.06	0.28	1.23033	-10.5568	-858.046	5.27791	-9.11438	11.575
Health Region 13	2012	44.68	0.9	51.5863	-6.77335	-13.1301	6.63896	38.5739	64.5986
Health Region 13	2013	50.4	0.96	44.8129	-8.24729	-18.4038	4.22681	36.5284	53.0974
Health Region 13	2014	48.12	0.93	35.0917	-11.3671	-32.3926	4.42224	26.4241	43.7593
Health Region 13	2015	15.63	0.53	22.0787	-13.0032	-58.8948	4.39388	13.4667	30.6907
Health Region 13	2016	0.07	0.04	9.08529	-10.5141	-115.727	4.03724	1.17229	16.9983
Health Region 13	2017	0.07	0.04	1.05046	-4.02499	-383.167	4.28555	-7.34922	9.45013
Health Region 13	2018	3.49	0.25	1.0353	3.39826	328.24	4.28555	-7.36438	9.43497
Health Region 13	2019	12.39	0.48	7.84697	7.72679	98.4684	4.03724	-0.0660245	15.76
Health Region 13	2020	11.67	0.46	16.4889	6.7033	40.6535	4.39388	7.87687	25.1009
Health Region 13	2021	24.07	0.67	21.2536	1.48044	6.9656	4.42224	12.586	29.9212
Health Region 13	2022	21.25	0.62	19.4498	-4.13166	-21.2427	4.22681	11.1652	27.7343
Health Region 13	2023	10.93	0.44	12.9903	-6.45949	-49.7256	6.63896	-0.0220884	26.0026
